# Supplementary material for: MicroRNA-101 targets EZH2, MCL-1 and FOS to suppress proliferation, invasion and stem cell-like phenotype of aggressive endometrial cancer cells
Source: PubMed Central journal article supplement (PMC4171612; doi:10.18632/oncotarget.2157), 2014-07-02
Supplement: oncotarget-05-6049-s001.pdf [file oncotarget-05-6049-s001.pdf]

# MicroRNA-101 targets EZH2, MCL-1 and FOS to suppress proliferation, invasion and stem cell-like phenotype of aggressive endometrial cancer cells

## Supplementary Material

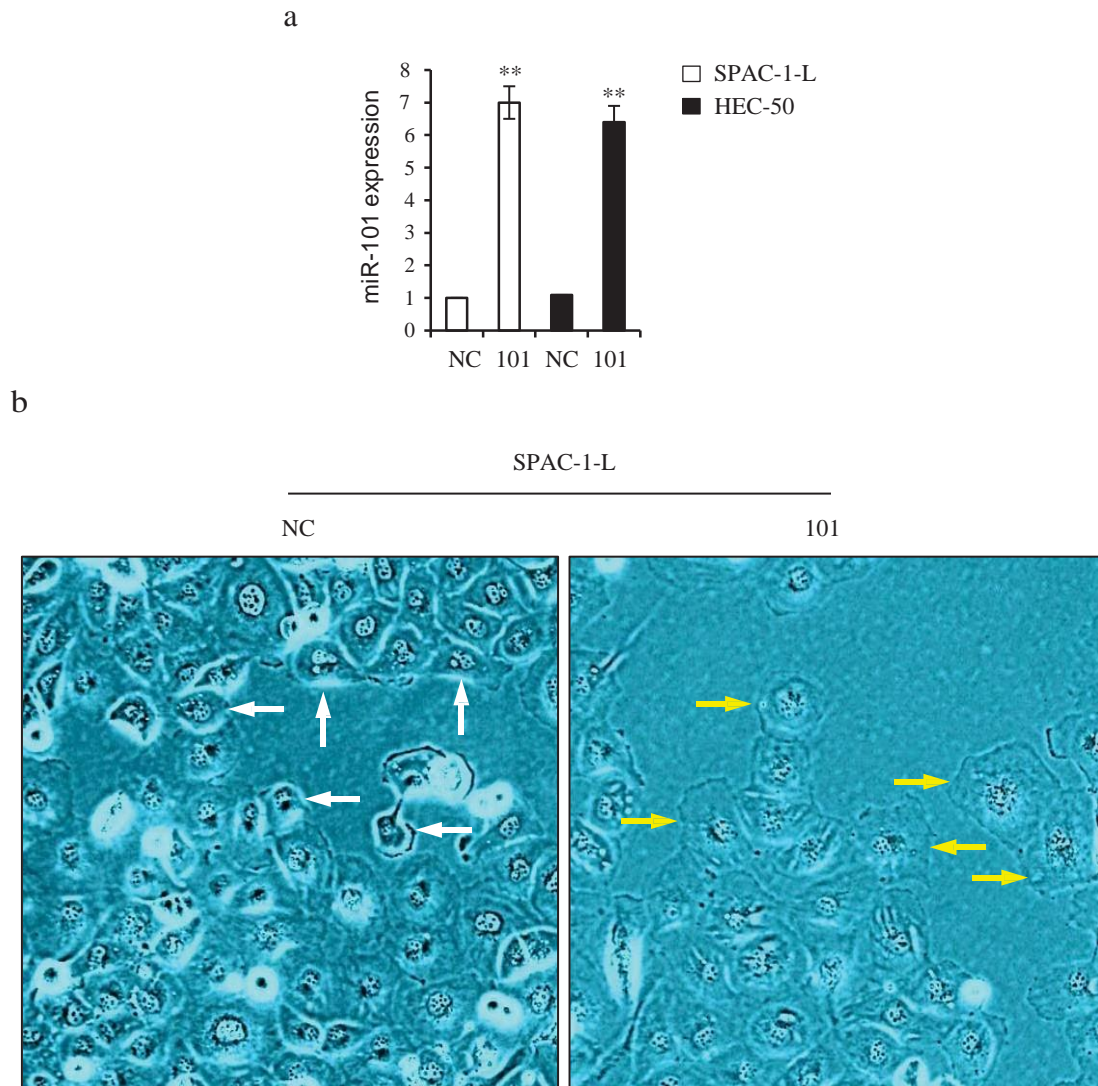

**Figure S1: Upregulation of miR-101 promoted senescence-associated morphological changes in SPAC-1-L cells.** (a) qRT-PCRs were conducted to quantify the relative miR-101 levels in SPAC-1-L and HEC-50 cells transfected with 101 or NC. \*\* $P < 0.01$ . (b) SPAC-1-L cells transfected with miR-101 exhibited an enlarged and flattened morphology (yellow arrows) as compared to NC- transfected cells (white arrows).

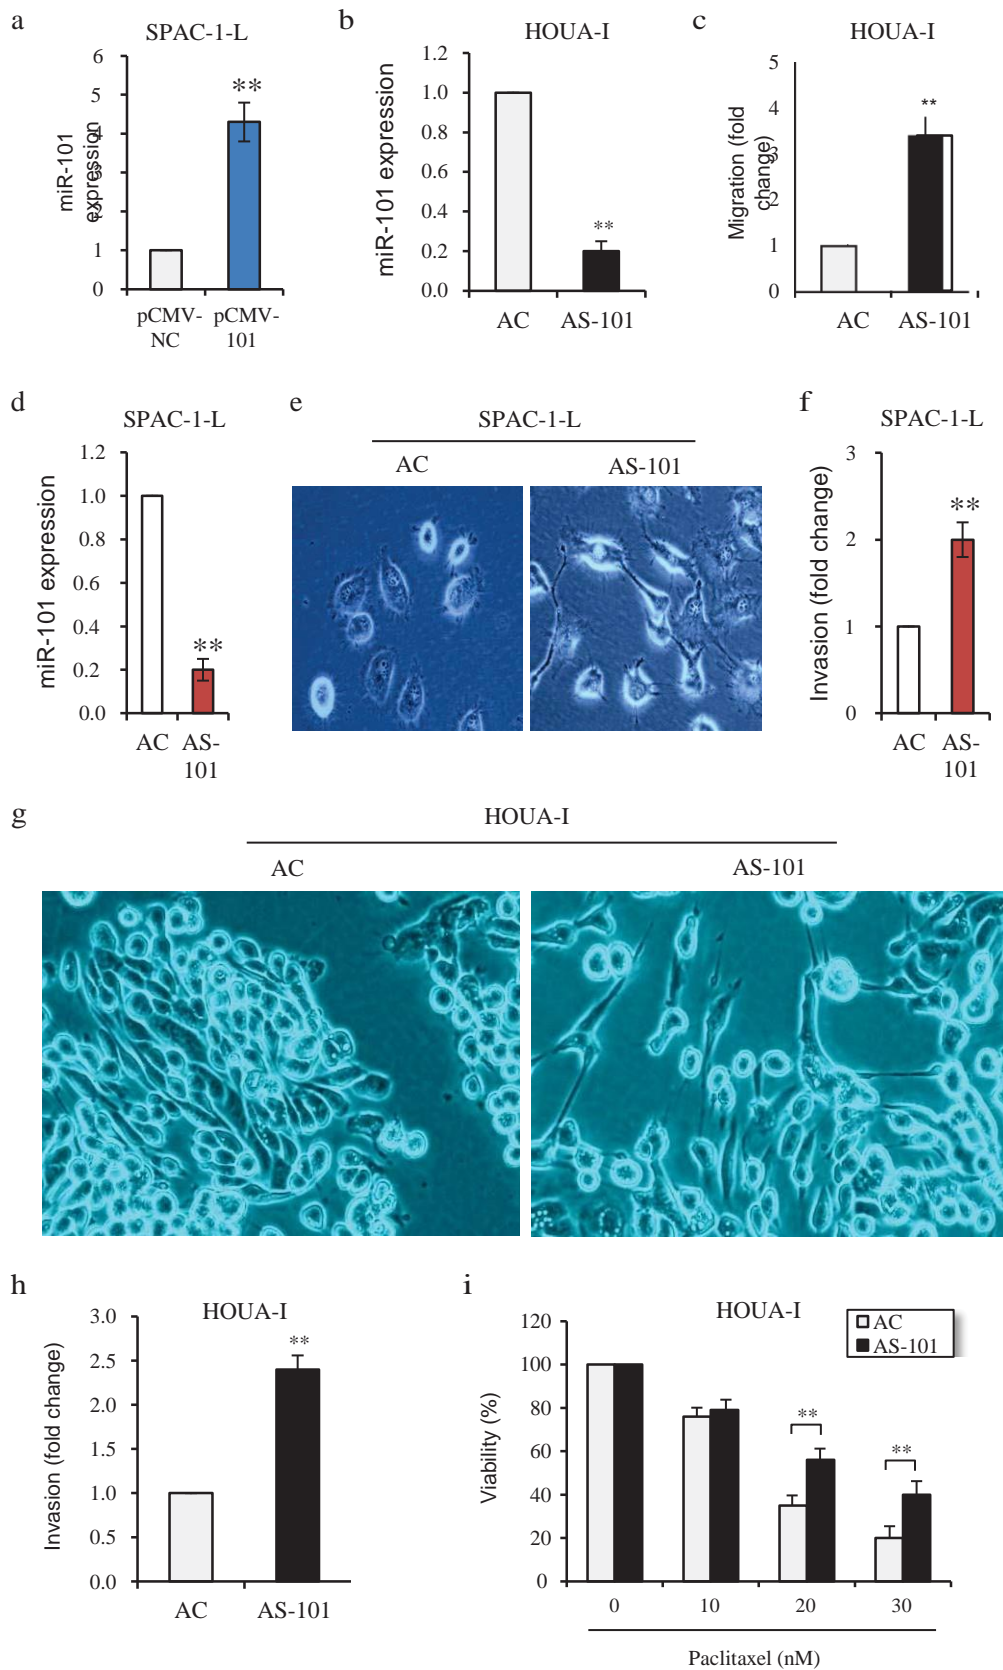

**Figure S2: Knockdown of miR-101 induced the EMT-associated cell migration, invasion and drug resistance of EC cells.** (a) qRT-PCR measurements of miR-101 levels in pre-101 (pCMV-101) or control vectors (pCMV-NC)-expressing SPAC-1-L cells. Knockdown of miR-101 in HOUA-I cells (b) induced cell migration in a transwell migration assays (c). SPAC-1-L cells transfected with AS-101 or AC (d) exhibited a more mesenchymal morphology (e) and enhanced invasive ability (f). Downregulation of miR-101 in HOUA-I cells was associated with EMT-like cell scattering (g) and increased invasion (h). (i) HOUA-I cells transfected with AS-101 or AC were treated with Paclitaxel for 24 hours. Cell viability was measured with cell counting kit-8 assay. The values were expressed as the percentage of viable cells, with the viability of DMSO-treated cells set at 100%. \*\*P < 0.01.

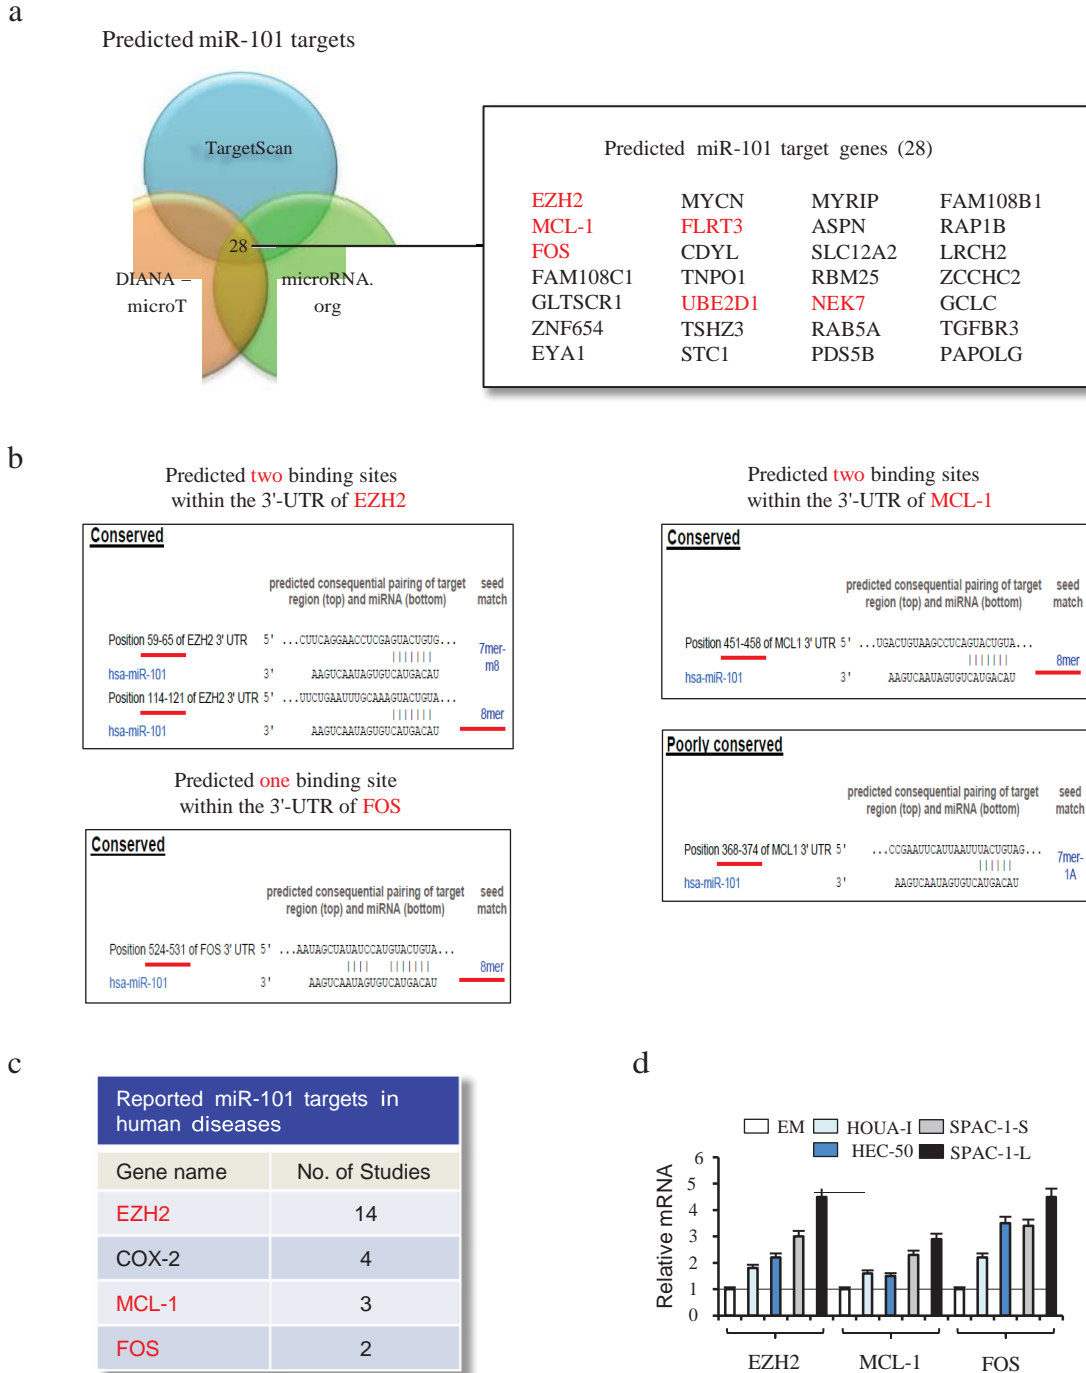

**Figure S3: Candidate miR-101 target genes.** (a) Venn diagrams showed 28 genes that were potential miR-101 targets predicted by TargetScan, miRNA.org and DIANA-microT. (b) Predicted (TargetScan) binding sites within the 3'-UTR of EZH2 (two binding sites), MCL-1 (two binding sites) and FOS (sole binding site). (c) EZH2, MCL-1 and FOS were known miR-101 targets in human diseases except endometrial cancer. (d) qRT-PCR analysis of EZH2, MCL-1 and FOS in four aggressive endometrial cancer cell lines and immortalized epithelial cell line EM.

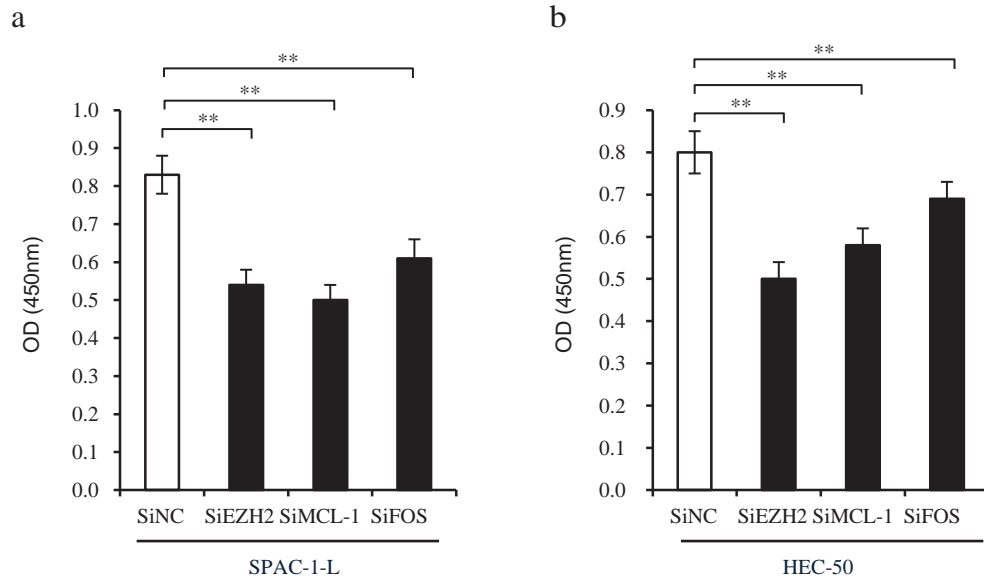

**Figure S4: Specific siRNA-mediated downregulation of EZH2, MCL-1 and FOS suppressed proliferation in EC cells.** Cell proliferation of SPAC-1-L (a) and HEC-50 (b) cells transfected with specific siRNAs (siEZH2, siMCL-1, siFOS) or control siRNA were quantified using cell counting kit-8 assays. \*\*P < 0.01.

**Table S1: Clinical features of 50 endometrial cancer patients.**

| Characteristics               | Factors      | Number of cases | Percentage (%) |
|-------------------------------|--------------|-----------------|----------------|
| Age (years)                   | ≤55          | 26              | 52             |
|                               | > 55         | 24              | 48             |
| FIGO Stage                    | I            | 28              | 56             |
|                               | II           | 7               | 14             |
|                               | III          | 12              | 24             |
|                               | IV           | 3               | 6              |
| Histology                     | endometrioid | 50              | 100            |
| Histologic grade              | I-II         | 0               | 0              |
|                               | III          | 50              | 100            |
| Deep Invasion                 | (-)          | 24              | 48             |
|                               | (+)          | 26              | 52             |
| Tumor diameter (cm)           | ≤3           | 21              | 42             |
|                               | > 3          | 29              | 58             |
| Nodal Matastasis              | (-)          | 40              | 80             |
|                               | (+)          | 10              | 20             |
| Lymph vascular space invasion | (-)          | 39              | 78             |
|                               | (+)          | 11              | 22             |
| Ovarian Matastasis            | (-)          | 45              | 90             |
|                               | (+)          | 5               | 10             |
| Estrogen receptor status      | (-)          | 18              | 36             |
|                               | (+)          | 32              | 64             |
| Progesterone receptor status  | (-)          | 14              | 28             |
|                               | (+)          | 36              | 72             |

**Table S2: IHC data on EZH2, MCL-1 and FOS expression in normal endometrium samples.**

| <b>Case</b> | <b>Age(years)</b> | <b>Normal endometrium</b> | <b>EZH2 IHC</b> | <b>MCL-1 IHC</b> | <b>FOS IHC</b> |
|-------------|-------------------|---------------------------|-----------------|------------------|----------------|
| 1           | 36                | yes                       | 5               | 4                | 5              |
| 2           | 39                | yes                       | 5               | 0                | 5              |
| 3           | 43                | yes                       | 5               | 0                | 6              |
| 4           | 45                | yes                       | 4               | 0                | 5              |
| 5           | 44                | yes                       | 4               | 0                | 6              |
| 6           | 38                | yes                       | 3               | 0                | 0              |
| 7           | 37                | yes                       | 3               | 0                | 0              |
| 8           | 46                | yes                       | 2               | 0                | 4              |
| 9           | 35                | yes                       | 1               | 0                | 4              |
| 10          | 50                | yes                       | 1               | 0                | 0              |
| 11          | 49                | yes                       | 1               | 0                | 0              |
| 12          | 42                | yes                       | 1               | 1                | 1              |
| 13          | 41                | yes                       | 0               | 1                | 1              |
| 14          | 39                | yes                       | 0               | 1                | 1              |

IHC: immunochemical analysis of EZH2, MCL-1 and FOS, as measured by the immunostaining scores.

**Table S3: IHC data on EZH2, MCL-1 and FOS expression in endometrial cancer samples.**

| Case | Age(years) | Tumor Type | FIGO Stage | Grade of tumor | EZH2 IHC | MCL-1 IHC | FOS IHC |
|------|------------|------------|------------|----------------|----------|-----------|---------|
| 1    | 34         | EEC        | 1a         | 3              | 2        | 1         | 4       |
| 2    | 38         | EEC        | 1b         | 3              | 7        | 5         | 4       |
| 3    | 40         | EEC        | 1b         | 3              | 6        | 0         | 7       |
| 4    | 41         | EEC        | 3c         | 3              | 4        | 1         | 2       |
| 5    | 42         | EEC        | 2          | 3              | 5        | 1         | 2       |
| 6    | 43         | EEC        | 3c         | 3              | 5        | 1         | 2       |
| 7    | 45         | EEC        | 1a         | 3              | 6        | 0         | 7       |
| 8    | 46         | EEC        | 1a         | 3              | 4        | 4         | 2       |
| 9    | 46         | EEC        | 1a         | 3              | 2        | 1         | 1       |
| 10   | 47         | EEC        | 3c         | 3              | 6        | 0         | 7       |
| 11   | 48         | EEC        | 2          | 3              | 6        | 0         | 6       |
| 12   | 49         | EEC        | 1a         | 3              | 6        | 0         | 7       |
| 13   | 49         | EEC        | 2          | 3              | 7        | 4         | 1       |
| 14   | 49         | EEC        | 3c         | 3              | 5        | 1         | 1       |
| 15   | 50         | EEC        | 3c         | 3              | 5        | 1         | 5       |
| 16   | 50         | EEC        | 1b         | 3              | 2        | 1         | 6       |
| 17   | 51         | EEC        | 1b         | 3              | 7        | 4         | 5       |
| 18   | 51         | EEC        | 4          | 3              | 7        | 6         | 5       |
| 19   | 53         | EEC        | 1a         | 3              | 6        | 0         | 6       |
| 20   | 53         | EEC        | 1b         | 3              | 6        | 0         | 7       |
| 21   | 53         | EEC        | 1b         | 3              | 2        | 1         | 6       |
| 22   | 54         | EEC        | 1a         | 3              | 1        | 5         | 6       |
| 23   | 54         | EEC        | 1a         | 3              | 7        | 4         | 5       |
| 24   | 55         | EEC        | 1a         | 3              | 7        | 0         | 7       |
| 25   | 55         | EEC        | 1a         | 3              | 6        | 0         | 7       |
| 26   | 55         | EEC        | 4          | 3              | 6        | 0         | 7       |
| 27   | 56         | EEC        | 1a         | 3              | 2        | 4         | 6       |
| 28   | 57         | EEC        | 1a         | 3              | 7        | 3         | 4       |
| 29   | 57         | EEC        | 1a         | 3              | 6        | 2         | 6       |
| 30   | 57         | EEC        | 3c         | 3              | 7        | 5         | 6       |
| 31   | 59         | EEC        | 3c         | 3              | 5        | 1         | 1       |
| 32   | 59         | EEC        | 4          | 3              | 5        | 1         | 2       |
| 33   | 59         | EEC        | 1a         | 3              | 7        | 0         | 7       |
| 34   | 59         | EEC        | 1a         | 3              | 6        | 2         | 6       |
| 35   | 60         | EEC        | 3a         | 3              | 7        | 5         | 7       |

|    |    |     |    |   |   |   |   |
|----|----|-----|----|---|---|---|---|
| 36 | 60 | EEC | 2  | 3 | 7 | 4 | 5 |
| 37 | 60 | EEC | 3a | 3 | 2 | 2 | 1 |
| 38 | 61 | EEC | 1a | 3 | 7 | 0 | 7 |
| 39 | 61 | EEC | 1b | 3 | 7 | 5 | 7 |
| 40 | 61 | EEC | 2  | 3 | 6 | 0 | 6 |
| 41 | 62 | EEC | 1a | 3 | 7 | 3 | 4 |
| 42 | 62 | EEC | 1a | 3 | 7 | 0 | 7 |
| 43 | 64 | EEC | 2  | 3 | 7 | 5 | 7 |
| 44 | 64 | EEC | 3a | 3 | 1 | 4 | 6 |
| 45 | 67 | EEC | 3c | 3 | 7 | 6 | 5 |
| 46 | 68 | EEC | 3c | 3 | 4 | 4 | 5 |
| 47 | 69 | EEC | 1a | 3 | 7 | 4 | 5 |
| 48 | 72 | EEC | 2  | 3 | 6 | 0 | 6 |
| 49 | 75 | EEC | 1a | 3 | 7 | 3 | 4 |
| 50 | 76 | EEC | 1b | 3 | 2 | 1 | 6 |

EEC: endometrioid endometrial adenocarcinoma.

IHC: immunochemical analysis of EZH2, MCL-1 and FOS, as measured by the immunostaining scores.
